# Supplementary material for: Size- and time-dependent alteration in metabolic activities of human hepatic cytochrome P450 isozymes by gold nanoparticles via microsomal coincubations
Source: PubMed Central journal article supplement (PMC4266508; doi:10.1186/1556-276x-9-642), 2014-11-28
Supplement: 1556-276X-9-642-S1.pdf [file 1556-276X-9-642-S1.pdf]

1  
2 Supporting information for

3  
4  
5 **Size- and time-dependent Alteration in Metabolic Activities of**  
6 **Human Hepatic Cytochrome P450 Isozymes by Gold**  
7 **Nanoparticles via Microsomal Conincubations**

8  
9 Ling Tang,<sup>†</sup> Meiling Ye,<sup>†</sup> Mengjun Luo,<sup>‡</sup> Bin Guo,<sup>\*,†</sup> Jing Zhou,<sup>†</sup> Yangyuan Liu,<sup>†</sup> Bo Chen<sup>†</sup>

10  
11 <sup>†</sup> *Key Laboratory of Chemical Biology and Traditional Chinese Medicine Research (Ministry of*  
12 *Education of China), Key Laboratory of Phytochemical R&D of Hunan Province, Hunan Normal*  
13 *University, Changsha 410081, China*

14 <sup>‡</sup> *Yiyang Medical College, Yiyang 413000, China*

15  
16 \* *To whom correspondence should be addressed. Tel.: +86 731 85627818; fax: +86 731 85627818.*

17 *E-mail address: [binguo@126.com](mailto:binguo@126.com) (B. Guo)*

1  
2  
3  
4  
5  
6  
7  
8  
9

**Figure S1.**

Size-dependent optical properties of tannic acid-coated AuNPs at mass concentration of 1 mg/mL and 25 µg/mL (top); a comparison of the UV/Vis spectra of gold colloid in 6 months of storage (bottom). The UV-Vis absorption spectra with the centered bands were consistent with well-dispersed, spherical AuNPs in aqueous media.

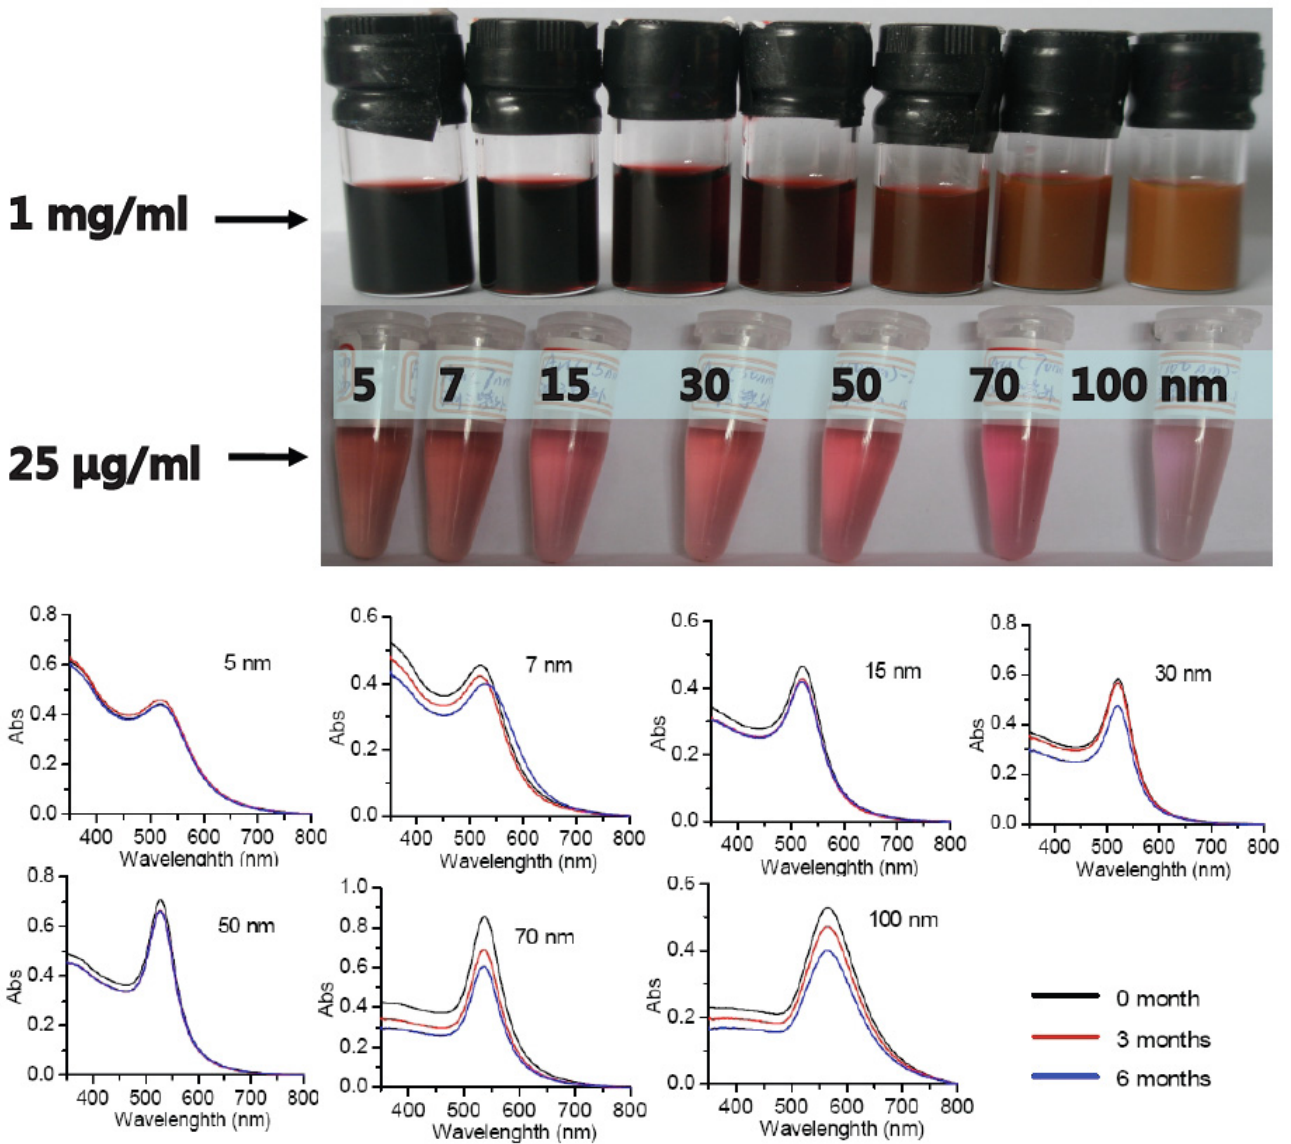

10  
11  
12  
13  
14  
15

1  
2  
3  
4  
5  
6  
7

**Figure S2.**

BSA-induced alteration in UV-vis extinction spectra of AuNPs and absorbance value at  $\lambda_{\max}$  when initial incubating (at 0 min) with different BSA concentrations.

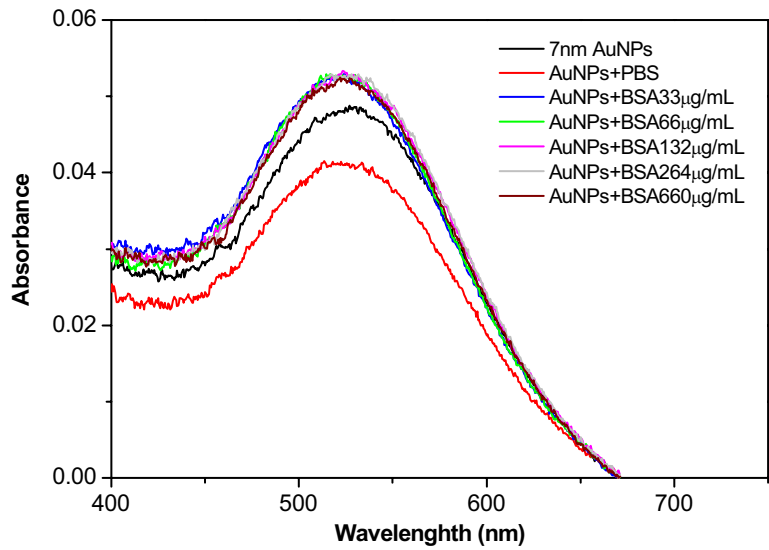

8

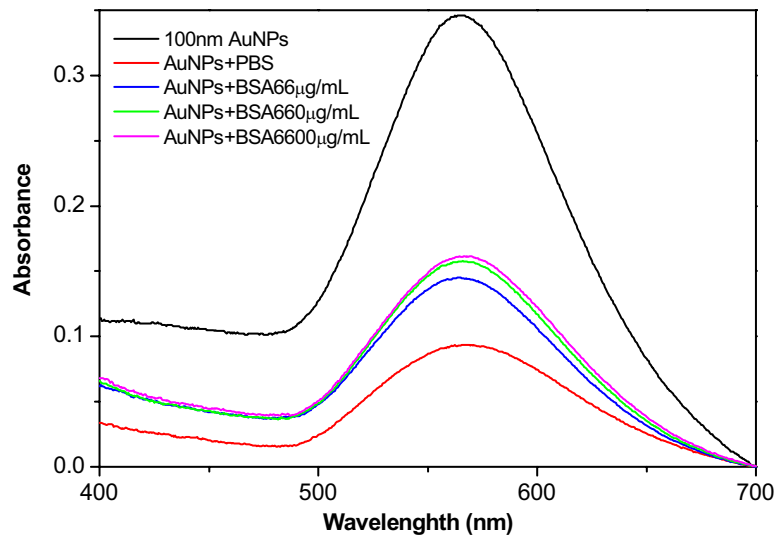

9  
10  
11  
12  
13  
14  
15  
16  
17

1

**Table S1.** Technical data sheet of physicochemical characteristics of PELCO tannic BioPure™ gold nanoparticles investigated

| Nominal size | Lot number | Diameter (nm) | Concentration (particles/mL) | Maximum absorption peak ( $\lambda_{\text{max}}$ , nm) | Zeta potential (mV) | Hydrodynamic diameter (nm) | Solution pH |
|--------------|------------|---------------|------------------------------|--------------------------------------------------------|---------------------|----------------------------|-------------|
| 5 nm         | DAG1519    | 4.7 ± 0.7     | 1.1 × 10 <sup>15</sup>       | 516                                                    | N/A                 | N/A                        | 4.8         |
| 7 nm         | DAG1533    | 6.5 ± 0.9     | 3.9 × 10 <sup>14</sup>       | 519                                                    | N/A                 | N/A                        | 4.6         |
| 15 nm        | DAG1490    | 15.5 ± 1.4    | 2.9 × 10 <sup>13</sup>       | 520                                                    | N/A                 | N/A                        | 4.5         |
| 30 nm        | EAW1056    | 28.6 ± 3.2    | 4.3 × 10 <sup>12</sup>       | 521                                                    | -22.4               | 34.6                       | 6.4         |
| 50 nm        | DAG1442    | 50.1 ± 5.1    | 7.9 × 10 <sup>11</sup>       | 530                                                    | -54.9               | 74.6                       | 7.2         |
| 70 nm        | DAG1286    | 67.5 ± 6.2    | 3.2 × 10 <sup>11</sup>       | 538                                                    | -43.1               | 78.2                       | 5.5         |
| 100 nm       | JMW1048    | 97.7 ± 9.5    | 1.1 × 10 <sup>11</sup>       | 568                                                    | -46.3               | 109.6                      | 6.2         |

2  
3  
4  
5  
6  
7  
8  
9  
10  
11  
12  
13

1

**Table S2.** Preparation of stock and working solution of substrates, Incubation conditions and analytical parameters for assays

|                                       | Phenacetin<br><i>O</i> -Deethylase<br>(CYP1A2) | Tolbutamide<br>Methylhydroxylase<br>(CYP2C9) | ( <i>S</i> )-Mephenytoin<br>4-Hydroxylase<br>(CYP2C19) | Dextromethorphan<br><i>O</i> -Demethylase<br>(CYP2D6) | Testosterone<br>6 $\beta$ -Hydroxylase<br>(CYP3A4) | Felodipine<br>Dehydrogenase<br>(CYP3A4) |
|---------------------------------------|------------------------------------------------|----------------------------------------------|--------------------------------------------------------|-------------------------------------------------------|----------------------------------------------------|-----------------------------------------|
| Preparation of solutions of substrate |                                                |                                              |                                                        |                                                       |                                                    |                                         |
| Stock solution (mM) (vehicle)         | 50.78 (ACN/H <sub>2</sub> O=1:1)               | 60.29 (ACN)                                  | 38.95 (ACN/H <sub>2</sub> O=1:1)                       | 9.95 (ACN/H <sub>2</sub> O=1:1)                       | 21.15 (ACN)                                        | 10.41 (ACN)                             |
| Working solution (mM) (vehicle)       | 1.02 (PBS)                                     | 2.41 (PBS)                                   | 1.61 (PBS)                                             | 0.20 (PBS)                                            | 1.59 (ACN/H <sub>2</sub> O=1:5)                    | 0.10 (H <sub>2</sub> O)                 |
| Incubation conditions                 |                                                |                                              |                                                        |                                                       |                                                    |                                         |
| Protein concentration (mg/ml)         | 0.05                                           | 0.1                                          | 0.15                                                   | 0.05                                                  | 0.05                                               | 0.05                                    |
| Substrates concentration ( $\mu$ M)   | 5.08                                           | 120.58                                       | 80.5                                                   | 9.95                                                  | 79.67                                              | 5.2                                     |
| Incubation time (min)                 | 10                                             | 20                                           | 30                                                     | 10                                                    | 10                                                 | 10                                      |
| Analyte                               | Acetaminophen                                  | Hydroxy Tolbutamide                          | 4-Hydroxy-mephenytoin                                  | Dextrophan                                            | 6 $\beta$ -Hydroxy-testosterone                    | Dehydro Felodipine                      |
| Mass spectrometer conditions          |                                                |                                              |                                                        |                                                       |                                                    |                                         |
| Declustering potential (V)            | 78                                             | 72                                           | 96                                                     | 96                                                    | 98                                                 | 110                                     |
| Collision energy (V)                  | 24                                             | 18                                           | 15                                                     | 36                                                    | 20                                                 | 34                                      |
| Analyte m/z transition                | 152.1 $\rightarrow$ 110.1                      | 287.2 $\rightarrow$ 188.2                    | 235.1 $\rightarrow$ 141.3                              | 258.3 $\rightarrow$ 199.0                             | 305.3 $\rightarrow$ 287.3                          | 383.2 $\rightarrow$ 354.1               |
| Retention time (min)                  | 8.04                                           | 7.73                                         | 7.13                                                   | 6.23                                                  | 7.84                                               | 11.89                                   |
| Analytical parameters of IS           |                                                |                                              |                                                        |                                                       |                                                    |                                         |
|                                       |                                                | m/z transition: 303.5 $\rightarrow$ 97.3;    | retention time: 10.50 min;                             | Declustering potential: 106 eV;                       | Collision energy: 37 eV.                           |                                         |

2

3
